# Supplementary material for: Parkinson’s disease patients show delayed hemodynamic changes in primary motor cortex in fine motor tasks and decreased resting-state interhemispheric functional connectivity: a functional near-infrared spectroscopy study
Source: PubMed Central journal article supplement (PMC11135928; doi:10.1117/1.nph.11.2.025004), 2024-05-29
Supplement: NPh_011_025004_SD001.pdf [file NPh_011_025004_SD001.pdf]

# Functional Near-Infrared Spectroscopy Reveals Delayed Hemodynamic Changes in the Primary Motor Cortex During Fine Motor Tasks and Decreased Interhemispheric Connectivity in Parkinson's Disease Patients

Edgar Guevara,<sup>a,b,\*</sup> Francisco Javier Rivas-Ruvalcaba,<sup>c</sup> Eleazar Samuel Kolosovas-Machuca,<sup>d</sup> Miguel G. Ramírez-Elías,<sup>d</sup> Ramón Díaz de Leon Zapata,<sup>e</sup> Jose Luis Ramirez-GarciaLuna,<sup>b,f</sup> Idefonso Rodríguez-Leyva<sup>c</sup>

<sup>a</sup>CONAHACYT-Universidad Autónoma de San Luis Potosí, Mexico

<sup>b</sup>Coordinación para la Innovación y Aplicación de la Ciencia y la Tecnología, Universidad Autónoma de San Luis Potosí, Mexico

<sup>c</sup>Neurology Service, Hospital Central "Dr. Ignacio Morones Prieto", Faculty of Medicine, Universidad Autónoma de San Luis Potosí, Mexico

<sup>d</sup>Faculty of Science, Universidad Autónoma de San Luis Potosí, Mexico

<sup>e</sup>Tecnológico Nacional de México, Campus San Luis Potosí, Mexico

<sup>f</sup>Division of Surgery, Hospital Central "Dr. Ignacio Morones Prieto", Faculty of Medicine, Universidad Autónoma de San Luis Potosí, Mexico

## Supplementary Material

**Table S1.** P-values after false discovery rate correction (FDR) of the group-level difference for two different conditions: right and left finger-tapping. Five different metrics extracted from the hemodynamic response were compared between controls and Parkinson's disease patients. Significant values after FDR correction are displayed in **bold**.

## Supplementary Material

**Table S1.** P-values after false discovery rate correction (FDR) of the group-level difference for two different conditions: right and left finger-tapping. Five different metrics extracted from the hemodynamic response were compared between controls and Parkinson's disease patients. Significant values after FDR correction are displayed in **bold**.

| Finger-tapping | Channel   | Peak   |        |        | Time to peak  |        |        | AUC    |        |        | Mean   |        |        | Slope  |        |        |
|----------------|-----------|--------|--------|--------|---------------|--------|--------|--------|--------|--------|--------|--------|--------|--------|--------|--------|
|                |           | HbO    | HbR    | HbT    | HbO           | HbR    | HbT    | HbO    | HbR    | HbT    | HbO    | HbR    | HbT    | HbO    | HbR    | HbT    |
| Right          | 13        | 0.7500 | 0.9705 | 0.9892 | 0.2686        | 0.8735 | 0.4402 | 0.9191 | 0.7623 | 0.9246 | 0.9447 | 0.7623 | 0.9246 | 0.9676 | 0.8187 | 0.8627 |
|                | 12        | 0.7500 | 0.9705 | 0.8541 | 0.5843        | 0.3905 | 0.4402 | 0.9461 | 0.7710 | 0.9246 | 0.9461 | 0.7710 | 0.9246 | 0.3207 | 0.8187 | 0.2548 |
|                | 17        | 0.7500 | 0.9705 | 0.4971 | 0.2686        | 0.9891 | 0.8272 | 0.9191 | 0.7710 | 0.7587 | 0.9447 | 0.7710 | 0.7587 | 0.3207 | 0.8811 | 0.2548 |
|                | 16        | 0.9461 | 0.9705 | 0.8627 | 0.2686        | 0.8735 | 0.4402 | 0.9461 | 0.9892 | 0.9246 | 0.9461 | 0.9892 | 0.9246 | 0.4076 | 0.8811 | 0.4434 |
|                | <b>15</b> | 0.9461 | 1.0000 | 0.7081 | <b>0.0047</b> | 0.8735 | 0.4402 | 0.9191 | 0.7710 | 0.9246 | 0.9447 | 0.7710 | 0.9246 | 0.3207 | 0.9676 | 0.3010 |
|                | 22        | 0.9461 | 0.9705 | 0.8627 | 0.5705        | 0.3905 | 0.7471 | 0.9191 | 0.7710 | 0.6832 | 0.9447 | 0.7710 | 0.6832 | 0.4076 | 0.8187 | 0.6344 |
|                | 21        | 0.7500 | 0.9705 | 0.4971 | 0.8604        | 0.3048 | 0.6645 | 0.9191 | 0.5678 | 0.6628 | 0.9447 | 0.5678 | 0.6628 | 0.3889 | 0.8187 | 0.2548 |
|                | 20        | 0.7500 | 0.9705 | 0.6738 | 0.8604        | 0.3905 | 0.5002 | 0.9191 | 0.8858 | 0.9246 | 0.9447 | 0.8627 | 0.9246 | 0.9676 | 0.9676 | 0.8817 |
|                | 19        | 0.7500 | 0.9705 | 0.4545 | 0.8604        | 0.8494 | 0.8392 | 0.9191 | 0.5678 | 0.4679 | 0.9447 | 0.5678 | 0.4679 | 0.5117 | 0.8187 | 0.2839 |
|                | 18        | 0.7500 | 1.0000 | 0.4545 | 0.8604        | 0.8735 | 0.6645 | 0.9191 | 0.7710 | 0.6628 | 0.9447 | 0.7710 | 0.6628 | 0.4076 | 0.9676 | 0.3010 |
| Left           | 1         | 0.8423 | 0.9560 | 0.9927 | 0.0505        | 0.5251 | 0.2546 | 0.5376 | 0.9892 | 0.7473 | 0.5376 | 0.9892 | 0.7473 | 0.8858 | 0.9892 | 0.9246 |
|                | 2         | 0.9892 | 0.9560 | 1.0000 | 0.8497        | 0.5251 | 0.7556 | 0.9676 | 0.7473 | 0.7557 | 0.9461 | 0.7473 | 0.7557 | 0.7754 | 0.6948 | 0.9246 |
|                | 4         | 0.9892 | 0.7205 | 0.9927 | 0.3593        | 0.5251 | 0.6638 | 0.6470 | 0.7473 | 0.7473 | 0.6470 | 0.7473 | 0.7473 | 0.6470 | 0.6948 | 0.9246 |
|                | 5         | 0.8423 | 0.9560 | 0.9927 | 0.5278        | 0.5251 | 0.7556 | 0.6257 | 0.7473 | 0.7473 | 0.6257 | 0.7473 | 0.7473 | 0.6470 | 0.9892 | 0.9246 |
|                | 6         | 0.9892 | 0.9560 | 0.9927 | 0.5524        | 0.5251 | 0.7556 | 0.9676 | 0.7473 | 0.7473 | 0.9461 | 0.7473 | 0.7473 | 0.9031 | 0.9892 | 0.9246 |
|                | 7         | 0.9892 | 0.9560 | 0.9927 | 0.7944        | 0.2136 | 0.6638 | 0.9676 | 0.7473 | 0.7473 | 0.9461 | 0.7473 | 0.7473 | 0.8858 | 0.9892 | 0.9246 |
|                | 8         | 0.9892 | 0.9892 | 1.0000 | 0.3593        | 0.5251 | 0.2546 | 0.9676 | 0.9892 | 0.7557 | 0.9461 | 0.9892 | 0.7557 | 0.6470 | 0.8750 | 0.9246 |
|                | 9         | 0.6011 | 0.9560 | 0.9927 | 0.4164        | 0.5251 | 0.6638 | 0.5376 | 0.7473 | 0.7473 | 0.5376 | 0.7473 | 0.7473 | 0.6470 | 0.6948 | 0.9246 |
|                | <b>10</b> | 0.9892 | 0.9560 | 1.0000 | <b>0.0450</b> | 0.9352 | 0.2546 | 0.6570 | 0.7473 | 0.7473 | 0.6570 | 0.7473 | 0.7473 | 0.6470 | 0.8750 | 0.9246 |
|                | 11        | 0.8423 | 0.9560 | 0.9927 | 0.7944        | 0.5251 | 0.6638 | 0.5731 | 0.7473 | 0.7473 | 0.5731 | 0.7473 | 0.7473 | 0.7754 | 0.7133 | 0.9246 |
